# Supplementary material
Source: ML conference proceedings conference paper supplement (https://openaccess.thecvf.com/content/CVPR2023/html/Yang_TINC_Tree-Structured_Implicit_CVPR_2023_paper.html)
Supplement: Supplementary file 1 [file Yang_TINC_Tree-Structured_Implicit_CVPR_2023_supplemental.zip]

Archive with 3 entries (3 files):
- biological data example.zip
- reproducible code.zip
- Supplementary Material for Paper ID 8035.pdf
